# Supplementary material for: Relative importance of uncertain model parameters driving water fluxes in a Land Surface Model
Source: Copernicus journal article supplement (doi:10.5194/hess-2024-73), 2024-04-04
Supplement: Supplementary file 1 [file hess-2024-73-supplement.pdf]

# Supplement material content

|       |                                                                  |    |
|-------|------------------------------------------------------------------|----|
| 1     | NIHM_Modular LandScape Model model description.....              | 2  |
| 1.1   | Energy balance model .....                                       | 2  |
| 1.1.1 | Estimation of the net radiation .....                            | 2  |
| 1.1.2 | Energy balance in the canopy.....                                | 2  |
| 1.1.3 | Energy balance at the soil surface .....                         | 4  |
| 1.2   | Water balance in the atmosphere-vegetation- soil system.....     | 5  |
| 1.2.1 | Water balance in the canopy .....                                | 5  |
| 1.2.2 | The snow routine .....                                           | 6  |
| 1.2.3 | Flow in the unsaturated zone.....                                | 7  |
| 2     | Estimation of canopy albedo .....                                | 8  |
| 3     | NIHM_Modular LandScape Model symbol list.....                    | 9  |
| 4     | Parameter identification codes for the sensitivity analysis..... | 12 |
| 5     | References .....                                                 | 13 |

## 1 NIHM\_Modular LandScape Model model description

The main mathematical formulations applied in NIHM-MLSM are described here. Symbols are detailed in a specific list for simplicity.

### 1.1 Energy balance model

Assuming steady state, energy balance at the soil surface can be formulated as:

$$R_n - \rho_w \lambda (E + Tr) - G - H = 0, \quad (1)$$

Here,  $R_n$  [ $\text{W.m}^{-2}$ ] is the net radiation reaching the surface;  $\rho_w \lambda E$  [ $\text{W.m}^{-2}$ ] is the surface latent heat flux related to evaporation;  $\rho_w \lambda Tr$  [ $\text{W.m}^{-2}$ ] is the surface latent heat flux related to transpiration;  $H$  [ $\text{W.m}^{-2}$ ] represents the sensible heat flux (also termed conductive heat flux) between the surface and the atmosphere; and  $G$  [ $\text{W.m}^{-2}$ ] is the conductive heat flux between the surface and the soil.

#### 1.1.1 Estimation of the net radiation

Soil net radiation  $R_n$  is rendered by (Haghighi et al., 2017):

$$R_n = R_{s\downarrow} (1 - \alpha) + \zeta \varepsilon (\varepsilon_a T_a^4 - T^4), \quad (2)$$

where  $R_{s\downarrow}$  [ $\text{W.m}^{-2}$ ] is the solar incoming radiation (short wave radiation),  $\alpha$  [-] is the albedo,  $\zeta$  [ $\text{kg.s}^{-3}.\text{K}^{-4}$ ] is the Stefan-Boltzmann constant,  $\varepsilon$  [-] is the surface emissivity,  $\varepsilon_a$  [-] is the air emissivity; and  $T_a$  [K] and  $T$  [K] are the air and surface temperature, respectively.

If the incoming long wave radiation  $R_{L\downarrow}$  is known, the net radiation reads:

$$R_n = R_{s\downarrow} (1 - \alpha) + \varepsilon R_{L\downarrow} - \varepsilon \zeta T^4, \quad (3)$$

Energy balance in NIHM-MLSM is formulated for the canopy, which is turn represented by a foliage layer and a soil layer with negligible heat capacity. The canopy layer is assumed to be semi-transparent with a reflectivity associated with the Beer-Lambert type transmission (Deardorff, 1978). Using the resistance analogy based on Ohm's law, conductive heat fluxes  $G$  and  $H$  are expressed in terms of the near-surface gradient of temperature.

#### 1.1.2 Energy balance in the canopy

For the surface near the canopy layer, the components of the energy balance are:

$$\begin{cases}
R_n = R_{s\downarrow}(1 - \alpha_c)(1 - e^{-K_{ext}LAI}) + \varepsilon_c R_{L\downarrow} - \varepsilon_c \zeta T_c^4 \\
H = \frac{\rho_a c_a}{r_{ac}}(T_c - T_a) \\
\rho_w \lambda Tr = \frac{\rho_a c_a}{\gamma(r_{ac} + r_c)}[e_s^{sat}(T_c) - e_s]
\end{cases} \quad (4)$$

Evaporation is included in the interception of precipitation by the vegetation (Kergoat, 1998); we refer to Section 2.1 for additional details. Knowledge of the aerodynamic canopy resistance  $r_{ac}$  and the stomatal canopy resistance  $r_c$  is required to solve system of Eqs. (4).

### 1.1.2.1 Aerodynamic canopy resistance

The aerodynamic canopy resistance ( $r_{ac}$ ) is computed as:

$$r_{ac} = \frac{\log((z_u - d_u)/z_{ou}) \cdot \log((z_h - d_h)/z_{oh})}{k^2 \cdot u_c} \quad (5)$$

Aerodynamic roughness parameters for vegetated areas are related to the vegetation height,  $h_c$ , by the empirical formulations of Brutsaert (1982):

$$\begin{cases}
z_u = h_c + W_T \\
z_h = z_u \\
d_u = 2/3 h_c \\
d_h = d_u \\
z_{ou} = 0.123 h_c \\
z_{oh} = 0.1 z_{ou}
\end{cases} \quad (6)$$

Wind speed,  $u_c$ , is computed by:

$$u_c = \begin{cases} u \log(z_u / z_{um})^{\kappa_u} & z_u > z_{um} \\ u & z_u \leq z_{um} \end{cases} \quad (7)$$

with  $\kappa_u = 0.413$  (Brutsaert, 2005).

### 1.1.2.2 Stomatal canopy resistance

In the literature, stomatal conductance is typically preferred to its inverse, i.e., the stomatal resistance. Stomatal conductance is calculated using a Jarvis-type multiplicative model (Cox et al. 1998; Jarvis 1976) and it is affected by environmental factors embedded in efficiency functions (solar radiation, air temperature, vapor pressure deficit, and CO<sub>2</sub> concentration). The  $LAI$  is used to scale stomatal conductance to canopy conductance, i.e.,

$$g_c = g_s^{\max} LAI_{act} (F_{PAR} F_{VPD} F_T F_{CO2}), \quad (8)$$

73 Here,  $g_s^{\max}$  is the maximum value of the stomatal conductance,  $LAI_{act}$  is the active part of the  
 74  $LAI$ . Considering the whole canopy as a ‘big leaf’, the active part of the canopy is equal to  $LAI$   
 75 or  $LAI/2$  if only one half of the big leaf is considered (Allen et al., 2004).

76 The efficiency functions  $F$  are defined by:

$$77 \quad F_{PAR} = \ln \left( \frac{R_s^* + K_{ext} R_{s\downarrow}}{R_s^* + K_{ext} R_{s\downarrow} \exp(-K_{ext} LAI)} \right), \quad (9)$$

78  $R_s^*$  corresponding a parameter that varies between 30 and 300 W/m<sup>2</sup> depending on species  
 79 (Saugier and Katerji, 1991).

80 The function  $F_{VPD}$  takes water pressure deficit into account as (Avissar et al., 1985):

$$81 \quad F_{VPD} = \left[ 1 + \exp(-2.86\Delta e - 3.110^{-6}) \right]^{-1}, \quad (10)$$

82 where  $\Delta e$  is vapor pressure difference between the canopy layer surface and the ambient air.

83 The function  $F_T$  describes the temperature dependence of the stomatal resistance and is  
 84 expressed as:

$$85 \quad F_T = \left( \frac{T_a - T_{\min}}{T_{opt} - T_{\min}} \right) \left( \frac{T_{\max} - T_a}{T_{\max} - T_{opt}} \right)^{(T_{\max} - T_{opt}) / (T_{opt} - T_{\min})}. \quad (11)$$

86 The optimal temperature  $T_{opt}$  is around 20 to 30°C (Baldocchi et al., 1991),  $T_{\min}$  and  $T_{\max}$   
 87 being about 5°C and 45°C, respectively (Jarvis, 1976).

88  $F_{CO_2}$  depends on the CO<sub>2</sub> concentration in the atmosphere according to:

$$89 \quad F_{CO_2} = \frac{1}{1.4 - 0.4 CO_2 / CO_2^*} \quad (12)$$

90 where  $CO_2$  [ppm] is carbon dioxide concentration in and  $CO_2^*$  [ppm] is the reference carbon  
 91 dioxide concentration (which is usually set at 330 ppm) (Stockle et al., 1992).

92

### 93 **1.1.3 Energy balance at the soil surface**

94 For the soil surface, the components of the energy balance equation are:

$$95 \quad \left\{ \begin{array}{l} R_{n,s} = R_{s\downarrow} (1 - \alpha_s) e^{-K_{ext} LAI} + \varepsilon_s R_{L\downarrow} - \varepsilon_s \zeta T_s^4 \\ G = \frac{\rho_a c_a}{r_g} (T_s - T_g) \\ H = \frac{\rho_a c_a}{r_{as}} (T_s - T_a) \\ \rho_w \lambda E = \frac{\rho_a c_a}{\gamma r_{as}} (e_s^{sat}(T_s) - e_s) \end{array} \right. \quad (13)$$

96 The aerodynamic soil resistance,  $r_{as}$ , is computed using the formulation of Choudhury and  
 97 Monteith (1988) and Shuttleworth and Gurney (1990), i.e.,

$$98 \quad \begin{cases} r_{as}^0 = \frac{\ln(z_u / z_{sr})^2}{k^2 u_z} \\ r_{as} = \begin{cases} r_{as}^0 / (1 + Ri)^2 & Ri < 0 \\ r_{as}^0 / (1 + Ri)^{0.75} & Ri > 0 \end{cases} \\ Ri = 5g(z_u - d_u) \frac{T_s - T_a}{T_a u^2} \end{cases} \quad (14)$$

99 The quantity  $r_{as}^0$  is considered as the resistance under neutral conditions (i.e., corresponding to  
 100 no temperature or vapor pressure differences at a horizontal surface of roughness  $z_{sr}$ ). Under  
 101 non-neutral conditions,  $r_{as}$  is modified using the Richardson number  $Ri$ .

102 Ground conduction is considered as a fraction of soil net radiation (Choudhury et al., 1987;  
 103 Kustas and Daughtry, 1990):

$$104 \quad G = \alpha Rn, \quad (15)$$

105 Here,  $\alpha = 0.50$  or  $0.70$  for bare soil or open water, respectively.

106

## 107 1.2 Water balance in the atmosphere-vegetation- soil system

### 108 1.2.1 Water balance in the canopy

109 Interception by the forest canopy plays a critical role by diverting significant quantities of  
 110 precipitation that would otherwise be directed to soil moisture, transpiration, and surface and  
 111 groundwater recharge. Key concepts of the water balance model include:

- 112 - the intercepted water  $I_c$  is evaporated and does not contribute to the throughfall;
- 113 - the excess of water is partly stored in the canopy, whose storage capacity  $S_c$  is limited to  
 114 a maximum value  $S_c^{\max}$  ;
- 115 - throughfall is the remaining part of exceeding water.

116 The amount of water intercepted by the canopy is given by (Kergouat, 1998):

$$117 \quad I_c = P_r \kappa_p LAI, \quad (16)$$

118 where  $\kappa_p$  is the rainfall interception coefficient whose value varies between 0.01 and 0.06  
 119 (Kergouat, 1998).

120 There are two different contributions to throughfall, i.e.,:

- 121 - the amount of water above the maximum storage capacity, defined by:

$$122 \quad T_{p1} = (S_c - S_c^{\max}) / \Delta t \quad (17)$$

- 123 - and the canopy leakage, defined by:

$$124 \quad T_{p2} = S_c (1 - K_c) / \Delta t \quad (18)$$

125 Water balance in the canopy is therefore expressed as:

$$126 \quad \begin{cases} \frac{dS_c}{dt} = P_r - E_c - T_p \\ E_c = I_c \\ T_p = T_{p1} + T_{p2} \end{cases}, \quad (19)$$

127  $P_r$ ,  $S_c$ , and  $T_p$  corresponding to the rainfall rate, the actual canopy storage, and the throughfall,  
128 respectively.

129 The maximum canopy storage capacity is estimated by (von Hoyningen-Huene, 1983):

$$130 \quad S_c^{\max} = (0.935 + 0.498 \cdot LAI - 0.00575 \cdot LAI^2) \cdot 10^{-3}. \quad (20)$$

131

### 132 1.2.2 The snow routine

133 The model is an adaptation of the snow module of the HBV hydrological model (Seibert and  
134 Bergström, 2022; Seibert and Vis, 2012). The first step consists in splitting precipitation (after  
135 interception) in either snow, rain, or both. This is achieved through the following formulations:

$$136 \quad \begin{cases} P_s = T_p & P_{Sn} = 0 & T \geq T_s^{\max} \\ P_s = 0 & P_{Sn} = T_p & T \leq T_s^{\min} \\ P_s = \kappa_{sn} T_p & P_{Sn} = (1 - \kappa_{sn}) T_p & T_s^{\min} < T < T_s^{\max} \end{cases}, \quad (21)$$

137 where  $P_s$  and  $P_{Sn}$  denote the amount of water and snow reaching the soils surface, respectively;  
138  $T_s^{\min}$  and  $T_s^{\max}$  are the two temperature thresholds, set to  $-3^\circ\text{C}$  and  $1^\circ\text{C}$ , respectively; and  $\kappa_p$  is  
139 a proportional factor varying linearly from 0 at  $T_s^{\min}$  to 1 at  $T_s^{\max}$ .

140 We use a conceptual model based on snowpack temperature to estimate snow volume and  
141 snowmelt flux. The average snow pack temperature is estimated through (Neitsch et al., 2002):

$$142 \quad T_{Sn}^{n+1} = \min(0, w_{sn} T_{Sn}^n + (1 - w_{sn}) \cdot T_A^n), \quad (22)$$

143 where  $T_{Sn}^n$  is the snow pack temperature [ $^\circ\text{C}$ ] at time step  $n$ ,  $T_A^n$  is the air temperature [ $^\circ\text{C}$ ], and  
144  $w_{sn}$  is a user defined weighting factor, here set to 0.3.

145 The stored snow volume is updated accordingly. Snow melting takes place only if the  
146 temperature is higher than the user defined melting temperature  $T_m$  (set to  $0^\circ\text{C}$  in this model)  
147 and if the snow pack temperature is  $0^\circ\text{C}$ . When these two conditions are fulfilled, the melted  
148 snow flux is given by:

$$149 \quad Q_{Sm} = \kappa_{Sm} (T_a^n - T_{Sm}), \quad (23)$$

150 where  $Q_{Sm}$  is the melted snow flux and  $\kappa_{Sm}$  is a proportionality coefficient, also termed degree-  
151 day factor, which is set to  $10^{-4} \text{ m/s/}^\circ\text{C}$ .

152

### 153 1.2.3 Flow in the unsaturated zone

154 Flow in the unsaturated zone is described by a series of reservoirs. The first two represent the  
 155 litter and the root zone, respectively. Each reservoir is defined by the water content at saturation,  
 156  $\theta_s$ , the water content at wilting point, considered as the residual water content,  $\theta_r$ , and the  
 157 water content at field capacity,  $\theta_c$ .

158 Throughfall and melted snow infiltrate in the litter layer. Evaporation computed by energy  
 159 balance at soil surface occurs in this layer only, and is depending on the water content. The  
 160 water drained from the litter layer enters the root layer. Transpiration, estimated by energy  
 161 balance at the canopy, occurs in this layer only, and is depending on the available water.  
 162 Drainage from these two layers is estimated in two ways: (i) the water volume above the layer  
 163 field capacity is drained immediately, representing water movement through gravity; (ii) when  
 164 the water content lies between the field capacity and the wilting point (residual water content),  
 165 drainage is computed as an exponential function of the available water.

166 Water balance for a given layer is formulated as:

$$167 \quad T_L \frac{d\theta}{dt} = Q_{in} - Q_s - Q_d, \quad (24)$$

168 where  $T_L$  is the layer thickness,  $\theta$  is the volumetric water content,  $Q_{in}$  is water infiltration  
 169 (throughfall and melted snow for the first layer),  $Q_s$  is the sink/source term due to evaporation  
 170 or transpiration, and  $Q_d$  is the drainage flux leaving the layer and supplying the next one.

171 For the first layer, if the water content is greater than porosity,  $\theta^{n+1}$  is set to the saturated water  
 172 content  $\theta_s$  and the amount of infiltrated water is reduced accordingly, assuming that runoff  
 173 occurs.

174 The drainage  $Q_d$  is computed through:

$$175 \quad \begin{cases} Q_d = (\theta - \theta_c) / \Delta t & \text{if } \theta \geq \theta_c \\ Q_d = (e^{\kappa_d(\theta - \theta_r)} - 1.00) / \Delta t & \text{if } \theta_r \leq \theta \leq \theta_c, \\ Q_d = 0.0 & \text{if } \theta \leq \theta_r \end{cases} \quad (25)$$

176 where  $\kappa_d$  is the drainage coefficient.

177 In this version of NIHM-MLSM, the root zone drainage is considered as groundwater recharge.

178

## 2 Estimation of canopy albedo

Values of albedo used in NIHM-MLSM are provided by satellite data and correspond to average values at the pixel size. Since information on land use are available (through Corine Land Cover), it is possible to distinguish bare soils from vegetated areas and assess energy balance. Following Taconnet et al. (1986), we consider a soil layer below the canopy that allows accounting for the reflection of the radiation trapped between soil and vegetation. The global albedo,  $\alpha_g$ , of this system is given by (Taconnet et al., 1986):

$$\alpha_g \simeq \sigma_c \alpha_c + \frac{\alpha_s (1 - \sigma_c)^2}{1 - \sigma_c \alpha_c \alpha_s}, \quad (26)$$

with:

$$\sigma_c = 1 - \exp(-K_{ext} LAI). \quad (27)$$

From the global albedo,  $\alpha_g$ , and assuming that the soil albedo,  $\alpha_s$ , is known, it is possible to estimate the canopy albedo by:

$$(\sigma_c^2 \alpha_s) \alpha_c^2 - \sigma_c (\alpha_g \alpha_s + 1) \alpha_c + (\alpha_g - \alpha_s (1 - \sigma_c)^2) = 0 \quad (28)$$

It can be readily shown that Eq. (28) has always two real solutions and only one, i.e.,:

$$\alpha_c = \frac{(\alpha_g \alpha_s + 1) - \sqrt{(\alpha_g \alpha_s - 1)^2 + 4 \alpha_s^2 (1 - \sigma_c)^2}}{2 \sigma_c \alpha_s}. \quad (28)$$

is comprised between 0 and 1.

| <i>Symbol</i> | <i>Description</i>                                                               | <i>Unit</i>                    | <i>Value</i>       |
|---------------|----------------------------------------------------------------------------------|--------------------------------|--------------------|
| $c_a$         | Specific heat of dry air at constant pressure                                    | J/kg/K                         | $1.013 \cdot 10^3$ |
| $CO_2$        | Carbone dioxide concentration (ppm)                                              | kg/kg                          |                    |
| $d_h$         | Reference elevation for humidity                                                 | m                              |                    |
| $d_u$         | Evaporation flux                                                                 | m/s                            |                    |
| $E_c$         | Evaporation flux from the canopy                                                 | m/s                            |                    |
| $e_a$         | Air partial water vapor pressure.                                                | Pa                             |                    |
| $e_s$         | Vapor pressure.                                                                  | Pa                             |                    |
| $e_s^{sat}$   | Vapor pressure at saturation.                                                    | Pa                             |                    |
| $F_{CO_2}$    | CO <sub>2</sub> efficiency function.                                             | -                              |                    |
| $F_{PAR}$     | Photosynthetic active radiation efficiency function.                             | -                              |                    |
| $F_T$         | Temperature efficiency function.                                                 | -                              |                    |
| $F_{VPD}$     | Vapor pressure deficit efficiency function.                                      | -                              |                    |
| $G$           | Conductive heat flux between surface and the ground                              | W/m <sup>2</sup>               |                    |
| $g$           | Gravity                                                                          | m/s <sup>2</sup>               | 9.81               |
| $g_c$         | Canopy conductance                                                               | m/s                            |                    |
| $g_s^{max}$   | Maximum conductance of fully open stomata                                        | m/s                            |                    |
| $H$           | Sensible heat flux (conductive heat flux) between the surface and the atmosphere | W/m <sup>2</sup>               |                    |
| $h_c$         | Canopy height                                                                    | m                              |                    |
| $I_c$         | Water interception by the canopy                                                 | m/s                            |                    |
| $K_{ext}$     | Attenuation coefficient depending on the vegetation                              | -                              |                    |
| $k$           | Von Karman constant                                                              | -                              | 0.40               |
| $LAI$         | Leaf area index                                                                  | m <sup>2</sup> /m <sup>2</sup> |                    |
| $LAI_{act}$   | Active part of the LAI                                                           | m <sup>2</sup> /m <sup>2</sup> |                    |
| $P_{atm}$     | Air pressure                                                                     | Pa                             |                    |
| $PAR$         | Photosynthetic active radiation (400–700 nm)                                     | W/m <sup>2</sup>               |                    |
| $P_r$         | Precipitation                                                                    | m/s                            |                    |
| $P_s$         | Precipitation as liquid                                                          | m/s                            |                    |
| $P_{sn}$      | Precipitation as snow                                                            | m/s                            |                    |
| $Q_{Sm}$      | Melted snow infiltration flux                                                    | m/s                            |                    |

|                    |                                                                                                        |                  |      |
|--------------------|--------------------------------------------------------------------------------------------------------|------------------|------|
| $Q_{in}^n$         | Reservoir inflow water flux                                                                            | m/s              |      |
| $Q_d^n$            | Reservoir drainage water flux                                                                          | m/s              |      |
| $Q_s^n$            | Sink/source term in the soil reservoir (evaporation for litter layer, transpiration for the root zone) | m/s              |      |
| $q_a$              | Air specific humidity                                                                                  | kg/kg            |      |
| $R_{\downarrow S}$ | Short wave radiation incoming from the sun (400–2500 nm).                                              | W/m <sup>2</sup> |      |
| $R_{\downarrow L}$ | Long wave (infra-red) incoming radiation                                                               | W/m <sup>2</sup> |      |
| $Ri$               | Richardson number                                                                                      | -                |      |
| $R_n$              | Net radiation                                                                                          | W/m <sup>2</sup> |      |
| $r_{ac}$           | Aerodynamic resistance of the canopy surface                                                           | s/m              |      |
| $r_{as}$           | Aerodynamic resistance of the soil surface                                                             | s/m              |      |
| $r_{as}^0$         | Soil surface aerodynamic resistance at neutral conditions                                              | s/m              |      |
| $r_c$              | Canopy resistance                                                                                      | s/m              |      |
| $r_g$              | Soil resistance to heat exchange                                                                       | s/m              |      |
| $S_c$              | Canopy water storage capacity                                                                          | m                |      |
| $S_c^{\max}$       | Canopy maximum water storage capacity                                                                  | m                |      |
| $T_a$              | Air temperature                                                                                        | K                |      |
| $T_c$              | Near canopy surface temperature                                                                        | K                |      |
| $T_s$              | Near soil surface temperature                                                                          | K                |      |
| $Tr$               | Transpiration flux                                                                                     | m/s              |      |
| $T_{min}$          | Minimal temperature threshold for stomatal resistance.                                                 | K                |      |
| $T_{max}$          | Maximal temperature threshold for stomatal resistance.                                                 | K                |      |
| $T_{opt}$          | Optimal temperature for stomatal resistance.                                                           | K                |      |
| $T_s^{\min}$       | Minimal temperature threshold for liquid/snow partition.                                               | K                |      |
| $T_s^{\max}$       | Maximal temperature threshold for liquid/snow partition.                                               | K                |      |
| $T_{Sm}$           | Snow melting threshold coefficient                                                                     | -                |      |
| $T_L$              | Layer thickness                                                                                        | m                |      |
| $T_p$              | Throughfall                                                                                            | m/s              |      |
| $T_{p1}$           | Throughfall from water excess                                                                          | m/s              |      |
| $T_{p2}$           | Throughfall from canopy drainage                                                                       | m/s              |      |
| $u$                | Measured wind speed                                                                                    | m/s              |      |
| $u_c$              | Corrected wind speed                                                                                   | m/s              |      |
| $w_{sn}$           | Weighting coefficient for snow storage                                                                 | -                | 0.30 |

|                  |                                                     |   |
|------------------|-----------------------------------------------------|---|
| $W_T$            | Turbulence layer thickness above canopy             | m |
| $z_u, z_h$       | Height above the canopy layer for wind and humidity | m |
| $z_{um}$         | Elevation at which wind speed has been measured     | m |
| $z_{sr}$         | Soil roughness length                               | m |
| $z_{ou}, z_{oh}$ | Roughness length for momentum and humidity          | m |

199

| Symbol                                        | Description                                                                     | Unit                           | Value*                 |
|-----------------------------------------------|---------------------------------------------------------------------------------|--------------------------------|------------------------|
| $\alpha_c, \alpha_s$                          | Canopy and soil albedo.                                                         | -                              |                        |
| $\chi$                                        | Psychrometric function.                                                         | Pa/K                           |                        |
| $\Delta e$                                    | Vapor pressure difference between the canopy layer surface and the ambient air. | Pa                             |                        |
| $\varepsilon_a, \varepsilon_c, \varepsilon_s$ | Air, canopy and soil emissivity and absorptivity.                               | -                              |                        |
| $\zeta$                                       | Stefan-Boltzmann constant.                                                      | W/m/K <sup>4</sup>             | 5.670 10 <sup>-8</sup> |
| $\theta$                                      | Water content.                                                                  | m <sup>3</sup> /m <sup>3</sup> |                        |
| $\theta_c$                                    | Water content at field capacity.                                                | m <sup>3</sup> /m <sup>3</sup> |                        |
| $\theta_r$                                    | Water content at the wilting point.                                             | m <sup>3</sup> /m <sup>3</sup> |                        |
| $\theta_\sigma$                               | Water content at saturation.                                                    | m <sup>3</sup> /m <sup>3</sup> |                        |
| $\kappa_d$                                    | Drainage coefficient.                                                           | -                              |                        |
| $\kappa_p$                                    | Rainfall interception coefficient.                                              | -                              |                        |
| $\kappa_{sn}$                                 | Water/snow partition coefficient.                                               | -                              |                        |
| $\kappa_{Sm}$                                 | Degree day factor for snow melting.                                             | m/s/°C                         | 10 <sup>-4</sup>       |
| $\lambda$                                     | Latent heat of water vaporization.                                              | J/kg                           | 2.45 10 <sup>6</sup>   |
| $\rho_a$                                      | Air density.                                                                    | kg/m <sup>3</sup>              | 1.204                  |
| $\rho_w$                                      | Water density.                                                                  | kg/m <sup>3</sup>              | 999.9                  |

200

201

#### 4 Parameter identification codes for the sensitivity analysis

| Id    | Parameter                                 |
|-------|-------------------------------------------|
| 1-12  | LAI                                       |
| 13-24 | Albedo                                    |
| 25    | Root zone field capacity                  |
| 26    | Root zone porosity                        |
| 27    | Litter drainage rate                      |
| 28    | Root zone drainage rate                   |
| 29    | Litter layer thickness                    |
| 30    | Litter layer porosity                     |
| 31    | Litter zone field capacity                |
| 32    | Rainfall interception coefficient.        |
| 33    | Canopy radiation attenuation coefficient  |
| 34    | Root zone thickness                       |
| 35    | Maximum conductance of fully open stomata |
| 36    | Canopy height                             |

The five last lines are repeated for each type of vegetation.

## 5 References

- Allan, R., Pereira, L., Smith, M., 1998. Crop evapotranspiration-Guidelines for computing crop water requirements-FAO Irrigation and drainage paper 56.
- Avissar, R., Avissar, P., Mahrer, Y., Bravdo, B.A., 1985. A model to simulate response of plant stomata to environmental conditions. *Agric. For. Meteorol.* 34, 21–29. [https://doi.org/10.1016/0168-1923\(85\)90051-6](https://doi.org/10.1016/0168-1923(85)90051-6)
- Baldocchi, D.D., Luxmoore, R.J., Hatfield, J.L., 1991. Discerning the forest from the trees: an essay on scaling canopy stomatal conductance. *Agric. For. Meteorol.* 54, 197–226. [https://doi.org/10.1016/0168-1923\(91\)90006-C](https://doi.org/10.1016/0168-1923(91)90006-C)
- Brutsaert, W., 2005. *Hydrology: An Introduction*, 1st ed. Cambridge University Press. <https://doi.org/10.1017/CBO9780511808470>
- Brutsaert, W., 1982. *Evaporation into the Atmosphere*. Springer Netherlands, Dordrecht. <https://doi.org/10.1007/978-94-017-1497-6>
- Choudhury, B.J., Monteith, J.L., 1988. A four-layer model for the heat budget of homogeneous land surfaces. *Q. J. R. Meteorol. Soc.* 114, 373–398. <https://doi.org/10.1002/qj.49711448006>
- Cox, P.M., Huntingford, C., Harding, R.J., 1998. A canopy conductance and photosynthesis model for use in a GCM land surface scheme. *J. Hydrol.* 212–213, 79–94. [https://doi.org/10.1016/S0022-1694\(98\)00203-0](https://doi.org/10.1016/S0022-1694(98)00203-0)
- Deardorff, J.W., 1978. Efficient prediction of ground surface temperature and moisture, with inclusion of a layer of vegetation. *J. Geophys. Res.* 83, 1889. <https://doi.org/10.1029/JC083iC04p01889>
- Haghighi, E., Kirchner, J.W., 2017. Near-surface turbulence as a missing link in modeling evapotranspiration-soil moisture relationships: ET-SOIL WATER COUPLING IN SEMIARID AREAS. *Water Resour. Res.* 53, 5320–5344. <https://doi.org/10.1002/2016WR020111>
- Idso, S.B., 1981. A set of equations for full spectrum and 8- to 14- $\mu\text{m}$  and 10.5- to 12.5- $\mu\text{m}$  thermal radiation from cloudless skies. *Water Resour. Res.* 17, 295–304. <https://doi.org/10.1029/WR017i002p00295>
- Jarvis, P.G., 1976. The Interpretation of the Variations in Leaf Water Potential and Stomatal Conductance Found in Canopies in the Field. *Philos. Trans. R. Soc. Lond. B. Biol. Sci.* 273, 593–610.
- Kergoat, L., 1998. A model for hydrological equilibrium of leaf area index on a global scale. *J. Hydrol.* 212–213, 268–286. [https://doi.org/10.1016/S0022-1694\(98\)00211-X](https://doi.org/10.1016/S0022-1694(98)00211-X)
- Kustas, W.P., Daughtry, C.S.T., 1990. Estimation of the soil heat flux/net radiation ratio from spectral data. *Agric. For. Meteorol.* 49, 205–223. [https://doi.org/10.1016/0168-1923\(90\)90033-3](https://doi.org/10.1016/0168-1923(90)90033-3)

246 Neitsch, S.L., ARNOLD, J.G., KINIRY, J.R., WILLIAMS, J.R., KING, K.W., 2002. Soil and  
247 Water Assessment Tool Theoretical Documentation - Version 2000.

248 Saugier, B., Katerji, N., 1991. Some plant factors controlling evapotranspiration. *Agric. For.*  
249 *Meteorol.* 54, 263–277. [https://doi.org/10.1016/0168-1923\(91\)90009-F](https://doi.org/10.1016/0168-1923(91)90009-F)

250 Seibert, J., Bergström, S., 2022. A retrospective on hydrological catchment modelling based on  
251 half a century with the HBV model. *Hydrol. Earth Syst. Sci.* 26, 1371–1388.  
252 <https://doi.org/10.5194/hess-26-1371-2022>

253 Seibert, J., Vis, M.J.P., 2012. Teaching hydrological modeling with a user-friendly catchment-  
254 runoff-model software package. *Hydrol. Earth Syst. Sci.* 16, 3315–3325.  
255 <https://doi.org/10.5194/hess-16-3315-2012>

256 Shuttleworth, W.J., Gurney, R.J., 1990. The theoretical relationship between foliage  
257 temperature and canopy resistance in sparse crops. *Q. J. R. Meteorol. Soc.* 116, 497–  
258 519. <https://doi.org/10.1002/qj.49711649213>

259 Stockle, C.O., Williams, J.R., Rosenberg, N.J., 1992. A Method for Estimating the Direct and  
260 Climatic Effects of Rising Atmospheric Carbon Dioxide on Growth and Yield of Crops:  
261 Part 1--Modification of the EPIC Model for Climate Change Analysis.

262 Taconet, O., Bernard, R., Vidal-Madjar, D., 1986. Evapotranspiration over an Agricultural  
263 Region Using a Surface Flux/Temperature Model Based on NOAA-AVHRR Data. *J.*  
264 *Clim. Appl. Meteorol.* 25, 284–307. [https://doi.org/10.1175/1520-0450\(1986\)025<0284:EOAARU>2.0.CO;2](https://doi.org/10.1175/1520-0450(1986)025<0284:EOAARU>2.0.CO;2)

266 Von Hoyningen-Huene, J., 1981. Die interzeption des Niederschlages in landwirtschaftlichen  
267 Pflanzenbeständen (Rainfall interception in agricultural plant stands). DVWK,  
268 Arbeitsbericht Deutscher Verband für Wasserwirtschaft und Kulturbau.

269
