# Supplementary material for: Relative importance of uncertain model parameters driving water fluxes in a Land Surface Model
Source: Copernicus journal article supplement (doi:10.5194/hess-2024-73), 2024-04-04
Supplement: Supplementary file [file hess-2024-73-AC2-supplement.pdf]

## **Reviewer #1**

### **GENERAL COMMENT:**

This paper shows the results of a comprehensive sensitivity analysis for three key hydrological variables (evaporation, transpiration and recharge) using a complex land surface model, the NIHM modular LSM. The sensitivity analysis is based on three metrics that evaluate the relative weight of different model parameters on the probability distribution, expected value and variance of the chosen variables. In addition, an interesting feature of the analysis is to identify the temporal change in relative weight of the parameters. On the other hand, although the authors choose two different locations to perform the sensitivity analysis, the spatial dimension seems less important and does not seem to be addressed by the results.

I believe that the work of Luttenauer et al. shows interesting results that could help to propose improvements in LSMs with respect to parameter values. It could help to open new perspectives to correct some flaws that could be observed when evaluating an LSM against observed data. But also, I think the article could be improved, especially in the discussion part. In my opinion, the authors address the problems they point out in the introduction, i.e., uncertainty in the knowledge of parameter values, and the need to identify important parameters, but they do not present the limitations and differences of their results compared to other examples in the literature. Following the same line, the authors do not attempt to state some general conclusions that could be useful for other models and scales, although I understand the difficulties in reaching such conclusions. In conclusion, I think the manuscript could benefit from showing some additional results, so that the results are better understood, and from a longer discussion, so that the implications and perspectives of these results are clearly stated and compared with other efforts in the literature.

We thank the Reviewer for the encouraging assessment of our work. We provide in the following our answers to the comments emerged.

### **MAJOR COMMENTS**

I would like to begin with two observations regarding the results presented.

First, LSMs differ from classical hydrological models mainly because they solve water and energy balances at the same time, estimating actual evapotranspiration fluxes as a function of available energy and water. Here I understand that the focus of the paper is water fluxes for a single pixel, so I will not consider any other energy-related variables, but I believe that at least one variable is missing in the analysis: surface runoff. Including surface runoff in Tables 3 and 4, and Figures 3 and 4 should be sufficient to better understand the response of the water system.

We did not take surface runoff under consideration because it was not observed on both sites. The soil is quite permeable in both catchments. It is mostly covered by vegetation and rain intensity is not high enough to generate significant runoff under those conditions. As such, our conclusions hold for sites or situations where runoff can be considered as negligible when

compared to the other water flux component (i.e., evaporation, transpiration, and groundwater recharge). This aspect will be clarified in the revised manuscript.

Also, if possible, I think the authors should include in the supplement a figure with the delimitation of the two river basins, and the pixels that were included in the analysis.

We will provide this figure in our revised manuscript.

The second observation concerns the relationship between LAI and albedo. The authors say that both parameters come from remotely sensed data, but also that this global albedo is split into soil and canopy albedos (section 2 of the supplement). Does this mean that albedo participates in the estimation of net radiation, but that both albedo and LAI participate in the partitioning of evapotranspiration between evaporation and transpiration? If so, that might explain why evaporation (which, I assume, always occurs under the canopy layer, i.e., the pixel does not have an area with bare soil fraction) is not sensitive to albedo values. If so, I would recommend the authors to clarify this relationship in section 2 (specifically line 333), and to consider it in the results section. Also, I'm not sure if I missed this, but there is no value for bare soil albedo (in line 190 of the supplement, it is assumed that the soil albedo is known). Please put the value used in the supplement.

Evaporation occurs under the canopy layer and depends on the amount of energy reaching the soil surface (i.e., the net radiation). Following Taconet et al. (1986), we consider the canopy layer as a semi transmissive layer and compute net radiation at the canopy and the soil surface using equation (1) and (2). The LAI appears in both equations and albedo values for the canopy and the soil are required. Satellite data provide an albedo value at the pixel scale and the canopy albedo is computed assuming the soil albedo value as known (see equation (28) in the supplementary material). Notice that this estimate of the net radiation is computed even if the pixel does not have a bare soil fraction and that the soil albedo is the albedo of a vegetated area. We set it to a value of 0.20 (Bonon, 2008).

We agree that this point is not well addressed in our manuscript. We will clarify this in the revised manuscript and supplementary material.

## References

- Taconet, O., Bernard, R., and Vidal-Madjar, D., Evapotranspiration over an Agricultural Region Using a Surface Flux/Temperature Model Based on NOAA-AVHRR Data, *J. Clim. Appl. Meteorol.*, 25, 284-307, [https://doi.org/10.1175/1520-0450\(1986\)025<0284:EOAARU>2.0.CO;2](https://doi.org/10.1175/1520-0450(1986)025<0284:EOAARU>2.0.CO;2), 1986.
- Bonan, G., Forests and Climate Change: Forcings, Feedbacks, and the Climate Benefits of Forests, *Science* 320, 5882, 1444-49. <https://doi.org/10.1126/science.1155121>, 2008.

As for the conclusions, I have two main observations:

First, I believe that the authors have not sufficiently related the results to the climatic and local conditions of the two basins. For example, with respect to groundwater recharge, and its sensitivity mainly to soil-related parameters, one would think that the two basins have sufficient water for evapotranspiration (i.e., the basins are energy-limited), and therefore, vegetation does not play an important role in the recharge rate.

We will improve the description of climatic conditions by including details about potential evaporation and transpiration. In the two settings considered, there is not enough stored water in the soil layers to satisfy the demand for evaporation and transpiration. In such scenarios, independent of the values of the vegetation related parameters that govern evaporation and transpiration, groundwater recharge is very limited as long as the available water quantity stored in the litter and root layers is smaller than potential evaporation and transpiration.

This would also mean that the partitioning of runoff between surface runoff and baseflow is also controlled by soil parameters. This idea seems consistent with the precipitation rates in both catchments (903 and 2541 mm) and with a small sensitivity of recharge to LAI values between May and October. Also, with a slightly higher sensitivity in the Bruche basin for LAI.

As we state above, the water demand to satisfy evaporation and transpiration is higher than the available water quantity stored in the litter (for evaporation) and in the root (for transpiration) layers. Therefore, the LAI values do not impact the simulated groundwater recharge.

Prompted by the Reviewer's comments, we will improve the discussion related to sensitivity of groundwater recharge to vegetation related parameters.

Second, I think the manuscript needs an effort to further discuss the implications of these results. For example, what are the implications of the sensitivity analysis for other land surface models? Is it possible for other land surface models (such as those used in climate models) to guide a parameter calibration based on these results? Or is it still acceptable to use simplified, a priori parameter values?

An *ab initio* uncertainty analyses should always be performed prior to running a land surface model. Doing so enables one to identify parameters and processes that require special attention due to their impact on model results. It will also guide model calibration because un-sensitive parameters cannot be calibrated and an a priori value can be acceptable. With reference to model calibration, we recall that a parameter can be sensitive while not being identifiable because of its strong correlation to other parameters. For example, if we consider the model  $y = (a + b) x$  (where  $y$  is the model output,  $x$  is model state variable and  $(a, b)$  are model parameters),  $y$  is sensitive to both parameters and  $a$  and  $b$  cannot be calibrated individually. We will include a short discussion about these elements in the revised manuscript.

What are the implications of these results for a model that includes new processes, which could change the relative weight of some parameters?

The results of a (global or local) sensitivity analysis are of course model dependent. Even considering diverse LSMs sharing some parameters, the relative weight of parameters may change. Otherwise, we think that, since water availability is a key variable for evaporation, transpiration and groundwater recharge, soil related parameters will play an important role. We will explicitly address this issue in the revised manuscript.

How could we address the complexification of LSMs and introduction of new features and processes, at least at the local scale used here?

This is precisely the benefit one can obtain upon relying on an *ab initio* global sensitivity analysis. The latter will yield quantitative appraisal of the importance of new features/processes that can eventually arise when considering various levels of complexity for a given model formulation. We have analyzed this specific aspect in a recent study (Ceresa et al., 2023; already referenced in the original manuscript). Albeit such study is focused on groundwater contamination by a given pharmaceutical product, it provides guidelines about the way global sensitivity analysis can be employed to explore the relative importance of diverse processes embedded in an interpretive model. We will include a short comment about this element in the revised manuscript.

## References

Ceresa, L., Guadagnini, A., Rodríguez-Escales, P., Riva, M., Sanchez-Vila, X., and Porta, G. M., On Multi-Model assessment of complex degradation paths: The fate of diclofenac and its transformation products. *Water Resources Research*, 59, e2022WR033183. <https://doi.org/10.1029/2022WR033183>, 2023.

I understand that this LSM is run at a local scale, while other LSMs are run at regional and global scales, so there is a scale issue regarding this analysis. Also, that there are important differences in model structure and processes representation that could prevent to state general conclusions. But the authors could use the results to further discuss the prospects of defining parameter values more carefully, and using sensitivity analysis to reduce the uncertainty of key variables for complex models such as LSMs.

We agree and will strengthen the Conclusions upon addressing the concept of scales and reliance on LSMs characterized by increased complexity levels.

I add some references that may be interesting for this discussion. For parameter sensitivity at different scales:

(<https://hess.copernicus.org/articles/24/3753/2020/>);

(<https://onlinelibrary.wiley.com/doi/10.1029/2019WR026612>);

An example of changes in the model output due to new processes or differences in the mathematical representation:

(<https://gmd.copernicus.org/articles/17/2141/2024/>);

(<http://doi.wiley.com/10.1002/2016JD025426>)

We are grateful to the Reviewer for pointing us to these additional references and will include those relevant to our work in the revised manuscript. These include the work by Tafasca et al. (2020; <https://hess.copernicus.org/articles/24/3753/2020/>), that shows that soil physical properties play an important role in estimating soil water and energy fluxes, as well as the study by Maina et al. (2020; <https://onlinelibrary.wiley.com/doi/10.1029/2019WR026612>), who rely on a semisynthetic test setting and perform a global sensitivity analysis based on Sobol and AMAE indices through a surrogate model (constructed through a polynomial chaos expansion approximation) to assess impacts of subsurface physical properties on evapotranspiration.

Otherwise, the study by Arboleda-Obando et al. (2024; <https://doi.org/10.5194/gmd-17-2141-2024>) illustrates a new irrigation scheme upon relying on the land surface model ORCHIDEE (ORganising Carbon and Hydrology in Dynamic EcosystEms) and is focused on conditioning actual irrigation according to available freshwater by including an environmental threshold and allocation rules that are related to local infrastructure. Finally, the work by Keune et al. (2016; <http://doi.wiley.com/10.1002/2016JD025426>) is chiefly focusing on groundwater and its impact (as evaluated through a scatterplot and an ANOVA approach) on feedbacks on land-surface and atmosphere during a specific event, i.e., the European heat wave that was observed in 2023. In this sense, we do see these as only marginally related to our work and would prefer to avoid referencing them. We will naturally abide by the Editor's decision on this point.

## References

- Tafasca, S., Ducharne, A., Valentin, C., 2020. Weak sensitivity of the terrestrial water budget to global soil texture maps in the ORCHIDEE land surface model. *Hydrol. Earth Syst. Sci.* 24, 3753–3774. <https://doi.org/10.5194/hess-24-3753-2020>
- Maina, F.Z., Siirila-Woodburn, E.R., 2020. The Role of Subsurface Flow on Evapotranspiration: A Global Sensitivity Analysis. *Water Resources Research* 56, e2019WR026612. <https://doi.org/10.1029/2019WR026612>
- Arboleda-Obando, P. F., Ducharne, A., Yin, Z., and Ciais, P.: Validation of a new global irrigation scheme in the land surface model ORCHIDEE v2.2, *Geosci. Model Dev.*, 17, 2141–2164, <https://doi.org/10.5194/gmd-17-2141-2024>, 2024
- Keune, J., F. Gasper, K. Goergen, A. Hense, P. Shrestha, M. Sulis, and S. Kollet (2016), Studying the influence of groundwater representations on land surface-atmosphere feedbacks during the European heat wave in 2003, *J. Geophys. Res. Atmos.*, 121, 13,301–13,325, doi:10.1002/2016JD025426.

Finally, I would suggest describing the mode setting in more detail. It is not clear if the model uses 8 km resolution like Safran, or if it is finer. Also, how does the model deal with land surface heterogeneity? On line 383 the authors say that only one vegetation type is used for Bruche, and two vegetation types for Doller. If the model uses an 8 km pixel, what is the implication of simplifying land surface heterogeneity for sensitivity analysis (if there is any implication)?

The size of the *computational pixel* (i.e., the size of the pixel at which energy and water balance are computed) is not provided in the original manuscript. It is around  $200 \times 200 \text{ m}^2$ . We do apologize for this oversight. Section 2.3 will be slightly modified to provide additional information about scales.

## MINOR OBSERVATIONS

Some additional observations and suggestions:

Decharme et al., 2019 is not in the references section. On the other hand, Decharme et al., 2011 is in references but not in the text. They both refer to ISBA model, Decharme et al., 2011 is interested in the sensitivity of the model to pedo-transfer functions in a soil multilayer representation, and Decharme et al., 2019 presents the ISBA-CTRIP model. Please review the reference list, and clarify the reference within the text.

We will thoroughly check the consistency between the main text and the reference list.

Also, here the authors are putting together regional and global scale LSMs. While essentially the same, regional models could represent in more details some processes, like horizontal groundwater flow, while global models try to parameterize the main processes in an idealized way. Two additional regional models: Catchment (Koster et al., 2000), LEAF2 (Fan and Miguez-Macho 2011), and one additional global model: ORCHIDEE (Krinner et al., 2005).

We will consider this element in the structure of the Introduction.

128: designed

132: “(a) 133 application of a unique model formulation across different soil and vegetation types is questionable” this phrase may be reformulated

334: I think that here, when you say “time” you refer to “moment”

384: not sure the word “exemplary” must be used here

519: It is difficult to say because curves are close between them, but it seems that unconditioned PDF and PDFs for higher albedo values are similar, so to say that higher transpiration values are controlled by higher albedo values is not straightforward for me.

Fig. 6 As Sobol and AMAV indices are similar (they both are based on variance), I would suggest to put them in the same column

621: maybe just put “by the drainage from the litter layer”

For supplementary, please numerate and put a caption to tables in section 3. Also, water content at saturation uses in line 156, and in table in section 3.

We will consider in details all of these comments and suggestions in our revised manuscript.
